# Supplementary material
Source: MDPI journal article supplement (https://www.mdpi.com/2073-4344/13/1/188)
Supplement: s1 [file s1]

## SUPPLEMENTARY INFORMATION

### a) General information

#### General information S1. UPLC-QqTOF-MS analysis for water samples

A liquid chromatography-quadrupole time-of-flight mass spectrometry (UPLC-QqTOF-MS) system was used for target and non-target analysis. Specifically, LC separation was achieved using an ACQUITY I-Class UPLC system (Waters Corporation, Milford, MA, USA) coupled with an ACQUITY BEH C18 (100 mm x 2.1 mm, 1.7  $\mu$ m) column. Mobile phases were 0.1% formic acid in MilliQ water (solvent A) and 0.1 % formic acid in MeOH (solvent B). The gradient used ranged from 5% to 95% of solvent B: Initially was increased from 5% to 25% in 1.50 min, after increased from 25% to 80%, kept at 80% during 1 min, increased in 8 min and from 80% to 95% in 1 min and finally returned to its initial conditions in 4 min. The total analysis run time was 15.50 min. The flow rate was adjusted at 0.25 mL/min and 10  $\mu$ L of sample was injected. The LC system was connected to a Bruker Daltonics, maXis q-TOF mass spectrometer equipped with an electrospray ion source (Bruker Daltonics, Bremen, Germany). The ion source settings were as follows: nitrogen was used as nebulizer, drying and collision gas; the nebulizer pressure was 2 bars, the drying gas flow was 8 L/min, the dry gas temperature was 200 °C and the capillary voltage was 4500 V. The system worked via TOF MS survey scan (resolving power  $\geq$  55000 FWHM). The chromatographic peaks were identified and reported from accurate-mass scan data using the software Target Analysis (1.3) and Data Analysis (4.2) from Bruker. In order to simplify, all analysis was performed in positive ionization mode.

#### General information S2. Solid-phase extraction (SPE) protocol

SPE was performed with commercial Oasis® HLB (200 mg, 6 cm<sup>3</sup>) using a Visiprep vacuum manifold. Before use, the cartridges were conditioned with 4 ml of methanol and 4 ml of Milli-Q water (pH adjusted to 8, same pH as the real water samples, in order not to alter their composition). Samples (100 ml) were passed through the cartridges at a flow rate of 1 ml/min. The cartridges were then rinsed with 4 ml of ultrapure water and vacuum dried for 10 min to remove excess of water. Finally, the retained compounds were eluted with 8 ml MeOH (4 + 4). The extracts were evaporated to dryness under a gentle nitrogen stream and reconstituted with 1 ml of H<sub>2</sub>O/MeOH (95:5, *v/v*) containing 0.1% formic acid. Final extracts were filtered through a 0.22  $\mu$ m PTFE filter.

b) Tables

Table S1. Inlet wastewater characterization (n=20)

| ANALYSED PARAMETERS |                                                           | VALUES                                        |
|---------------------|-----------------------------------------------------------|-----------------------------------------------|
| Physico-chemical    | pH                                                        | 7.4 ± 0.2                                     |
|                     | Turbidity (NTU)                                           | 4.8 ± 2.7                                     |
|                     | Temperature (°C)                                          | 20.0 ± 5.0                                    |
|                     | Electrical Conductivity (EC, dS/m)                        | 1.6 ± 0.2                                     |
|                     | 5-day Biochemical Oxygen Demand (BOD <sub>5</sub> , mg/L) | 15.3 ± 3.1                                    |
|                     | Chemical oxygen demand (COD, mg/L)                        | 75.2 ± 12.2                                   |
|                     | Total Nitrogen (TN, mg/L)                                 | 9.4 ± 1.8                                     |
|                     | Dissolved Organic Carbon (DOC, mg/L)                      | 30.1 ± 4.9                                    |
|                     | Total Solids (TSS, mg/L)                                  | 6.0 ± 4.5                                     |
|                     | Transmittance (%)                                         | 53.7 ± 4.6                                    |
|                     | F <sup>-</sup> (mg/L)                                     | 0.2 ± 0.03                                    |
|                     | Cl <sup>-</sup> (mg/L)                                    | 243.6 ± 47.1                                  |
|                     | NO <sub>2</sub> <sup>-</sup> (mg/L)                       | 1.4 ± 0.1                                     |
|                     | Br <sup>-</sup> (mg/L)                                    | 0.4 ± 0.1                                     |
|                     | NO <sub>3</sub> <sup>-</sup> (mg/L)                       | 9.9 ± 5.7                                     |
|                     | PO <sub>4</sub> <sup>3-</sup> (mg/L)                      | 9.1 ± 2.9                                     |
|                     | SO <sub>4</sub> <sup>2-</sup> (mg/L)                      | 200.8 ± 30.9                                  |
|                     | Sodium adsorption Ratio (SAR, meq/L)                      | 4.9 ± 1.0                                     |
| Microbiological     | <i>E. Coli</i> (CFU/100 mL)                               | 2.3 × 10 <sup>4</sup> ± 1.1 × 10 <sup>4</sup> |
|                     | <i>Clostridium perfringens</i> spores (CFU/100 mL)        | 800.0 ± 141.0                                 |

**Table S2. Suspect list developed under literature research**

| Pharmaceutica<br>1     | TP    | FORMULA          | REF.              | Pharmaceutica<br>1    | TP       | FORMULA        | REF.     |
|------------------------|-------|------------------|-------------------|-----------------------|----------|----------------|----------|
| AMOXICILLIN<br>(AMX)   | TPA1  | C10H12N2O3       | [46]              | ERYTHROMYCIN<br>(ERY) | TPE1     | C18H26O4       | [47]     |
|                        | TPA2  | C12H15NSO4       |                   |                       | TPE2     | C27H40O7       |          |
|                        | TPA3  | C12H16N2SO4      |                   |                       | TPE3     | C29H50O11      |          |
|                        | TPA4  | C13H12O7SN3      |                   |                       | TPE4     | C34H61NO1<br>3 |          |
|                        | TPA5  | C14H17N2SO4      |                   |                       | TPE5     | C36H65NO1<br>3 |          |
|                        | TPA6  | C14H19N3SO4      |                   |                       | TPE6     | C37H67NO1<br>4 |          |
|                        | TPA7  | C16H17N3SO9      |                   | KETOPROFEN<br>(KTP)   | TPK1     | C10H14O9       | [48]     |
|                        | TPA8  | C9H13N3SO2       |                   |                       | TPK2     | C10H8O8        |          |
| CARBAMAZEPINE<br>(CBZ) | TPC1  | C13H9NO          | [49-51]           |                       | TPK3     | C12H10O5       |          |
|                        | TPC2  | C11H10N2O6       |                   |                       | TPK4     | C14H14O11      |          |
|                        | TPC3  | C14H10N2O2       |                   |                       | TPK5     | C14H14O5       |          |
|                        | TPC4  | C14H11NO2        |                   |                       | TPK6     | C14H14O6       |          |
|                        | TPC5  | C14H11NO3        |                   |                       | TPK7     | C15H14O11      |          |
|                        | TPC6  | C14H11NO4        |                   |                       | TPK8     | C15H16O7       |          |
|                        | TPC7  | C14H9NO          |                   |                       | TPK9     | C16H14O3       |          |
|                        | TPC8  | C14H9NO2         |                   |                       | TPK10    | C16H14O5       |          |
|                        | TPC9  | C14H9NO2         |                   |                       | TPK11    | C16H8O12       |          |
|                        | TPC10 | C14H9NO3         |                   |                       | TPK12    | C4H4O5         |          |
|                        | TPC11 | C15H10N2O2       |                   |                       | TPK13    | C5H8O4         |          |
|                        | TPC12 | C15H10N2O3       |                   |                       | TPK14    | C5H8O6         |          |
|                        | TPC13 | C15H10N2O4       |                   |                       | TPK15    | C6H7O4         |          |
|                        | TPC14 | C15H12N2O2       |                   |                       | TPK16    | C9H9O3         |          |
|                        | TPC15 | C15H12N2O2       | NAPROXEN<br>(NPX) | TPN1                  | C10H10O2 | [48]           |          |
|                        | TPC16 | C15H12N2O3       |                   | TPN2                  | C10H8O   |                |          |
|                        | TPC17 | C15H12N2O4       |                   | TPN3                  | C10H8O2  |                |          |
|                        | TPC18 | C15H14N2O5       |                   | TPN4                  | C11H10O2 |                |          |
|                        | TPC19 | C8H6N2O          |                   | TPN5                  | C12H10O2 |                |          |
|                        | TPC20 | C8H6N2O2         |                   | TPN6                  | C13H12O3 |                |          |
|                        | TPC21 | C8H8N2O3         |                   | TPN7                  | C13H14O  |                |          |
|                        | TPC22 | C9H8N2O          |                   | TPN8                  | C14H11O5 |                |          |
| DICLOFENAC<br>(DCF)    | TPD1  | C10H7Cl2NO3      |                   | [49, 52-53]           | TPN9     |                | C14H13O6 |
|                        | TPD2  | C10H9Cl2NO3      |                   |                       | TPN10    |                | C14H14O5 |
|                        | TPD3  | C12H9Cl2NO       | TPN11             |                       | C14H14O7 |                |          |
|                        | TPD4  | C12H9Cl2NO4      | TPN12             |                       | C14H16O5 |                |          |
|                        | TPD5  | C13H9Cl2NO3      | TPN13             |                       | C5H8O4   |                |          |
|                        | TPD6  | C14H11Cl2NO<br>3 | TPN14             |                       | C7H10O5  |                |          |
|                        | TPD7  | C14H11Cl2NO<br>5 | TPN15             |                       | C7H6O2   |                |          |

|                                  |           |                |             |                               |           |                |             |
|----------------------------------|-----------|----------------|-------------|-------------------------------|-----------|----------------|-------------|
|                                  | TPD8      | C14H9Cl2NO3    |             |                               | TPN16     | C7H6O3         |             |
|                                  | TPD9      | C37H67NO14     |             |                               | TPN17     | C8H6O4         |             |
|                                  | TPD10     | C6H5Cl2N       |             |                               |           |                |             |
| <b>Pharmaceutica<br/>1</b>       | <b>TP</b> | <b>FORMULA</b> | <b>REF.</b> | <b>Pharmaceutica<br/>1</b>    | <b>TP</b> | <b>FORMULA</b> | <b>REF.</b> |
| <b>SULFAMETOXAZOLE<br/>(SMX)</b> | TPS1      | C10H10N2SO5    | [49, 53-54] | <b>TETRACYCLINE<br/>(TCL)</b> | TPTE1     | C20H17NO9      | [55]        |
|                                  | TPS2      | C10H10N3SO5    |             |                               | TPTE2     | C20H19NO10     |             |
|                                  | TPS3      | C10H11N3SO3    |             |                               | TPTE3     | C20H21NO11     |             |
|                                  | TPS4      | C10H9N3SO5     |             |                               | TPTE4     | C20H21NO13     |             |
|                                  | TPS5      | C11H15NO       |             |                               | TPTE5     | C20H21NO14     |             |
|                                  | TPS6      | C6H6N2SO4      |             |                               | TPTE6     | C22H26N2O13    |             |
|                                  | TPS7      | C6H8N2O2       |             |                               | TPTE7     | C22H27N2O9     |             |
|                                  | TPS8      | C7H5N3SO4      |             |                               | TPTE8     | C22H28N2O10    |             |
|                                  | TPS9      | C8H7NO         |             |                               | TPTE9     | C22H28N2O12    |             |

**Table S3. Transformation products detected under experimental conditions.**

| <b>Workflow<br/>(L/h)</b> | <b>Ozone<br/>supply<br/>gO<sub>3</sub>/h</b> | <b>Compound</b> | <b>Formula</b>                                                  | <b>Exact mass</b> | <b>Retention time<br/>(min)</b> | <b>Score</b> | <b>Mass<br/>error</b> | <b>Proposed<br/>name</b> |
|---------------------------|----------------------------------------------|-----------------|-----------------------------------------------------------------|-------------------|---------------------------------|--------------|-----------------------|--------------------------|
| 2000                      | 4.5                                          | CBZ             | C <sub>14</sub> H <sub>11</sub> NO <sub>2</sub>                 | 225.07            | 8.67                            | 100          | -1.7                  | TPC4-8,67                |
|                           | 11.4                                         | CBZ             | C <sub>14</sub> H <sub>11</sub> NO <sub>2</sub>                 | 225.07            | 8.67                            | 100          | -3.6                  | TPC4-8,67                |
|                           | 15.9                                         | CBZ             | C <sub>15</sub> H <sub>12</sub> N <sub>2</sub> O <sub>2</sub>   | 252.09            | 9.45                            | 100          | 3.3                   | TPC13-9,45               |
|                           | 15.9                                         | CBZ             | C <sub>14</sub> H <sub>11</sub> NO <sub>2</sub>                 | 225.07            | 8.67                            | 100          | -1.7                  | TPC4-8,67                |
|                           | 15.9                                         | DCF             | C <sub>14</sub> H <sub>11</sub> Cl <sub>2</sub> NO <sub>3</sub> | 311.01            | 9.08                            | 100          | 4.9                   | TPD6-9,08                |
|                           | 22.8                                         | CBZ             | C <sub>14</sub> H <sub>11</sub> NO <sub>2</sub>                 | 225.07            | 8.67                            | 100          | -1.5                  | TPC4-8,67                |
| 1200                      | 4.5                                          | CBZ             | C <sub>14</sub> H <sub>9</sub> NO <sub>3</sub>                  | 250.07            | 6.54                            | 100          | -0.3                  | TPC10-6,54               |
|                           | 11.4                                         | CBZ             | C <sub>14</sub> H <sub>9</sub> NO <sub>3</sub>                  | 250.07            | 6.54                            | 100          | 1.9                   | TPC10-6,54               |
| 500                       | 4.5                                          | NPX             | C <sub>10</sub> H <sub>10</sub> O <sub>2</sub>                  | 162.06            | 10.83                           | 100          | 0.8                   | TPN1-10,83               |
